# Supplementary material
Source: PubMed Central journal article supplement (PMC10585707)
Supplement: NIHMS1933042-supplement-Supplemental_Figures_and_Tables.pdf [file NIHMS1933042-supplement-Supplemental_Figures_and_Tables.pdf]

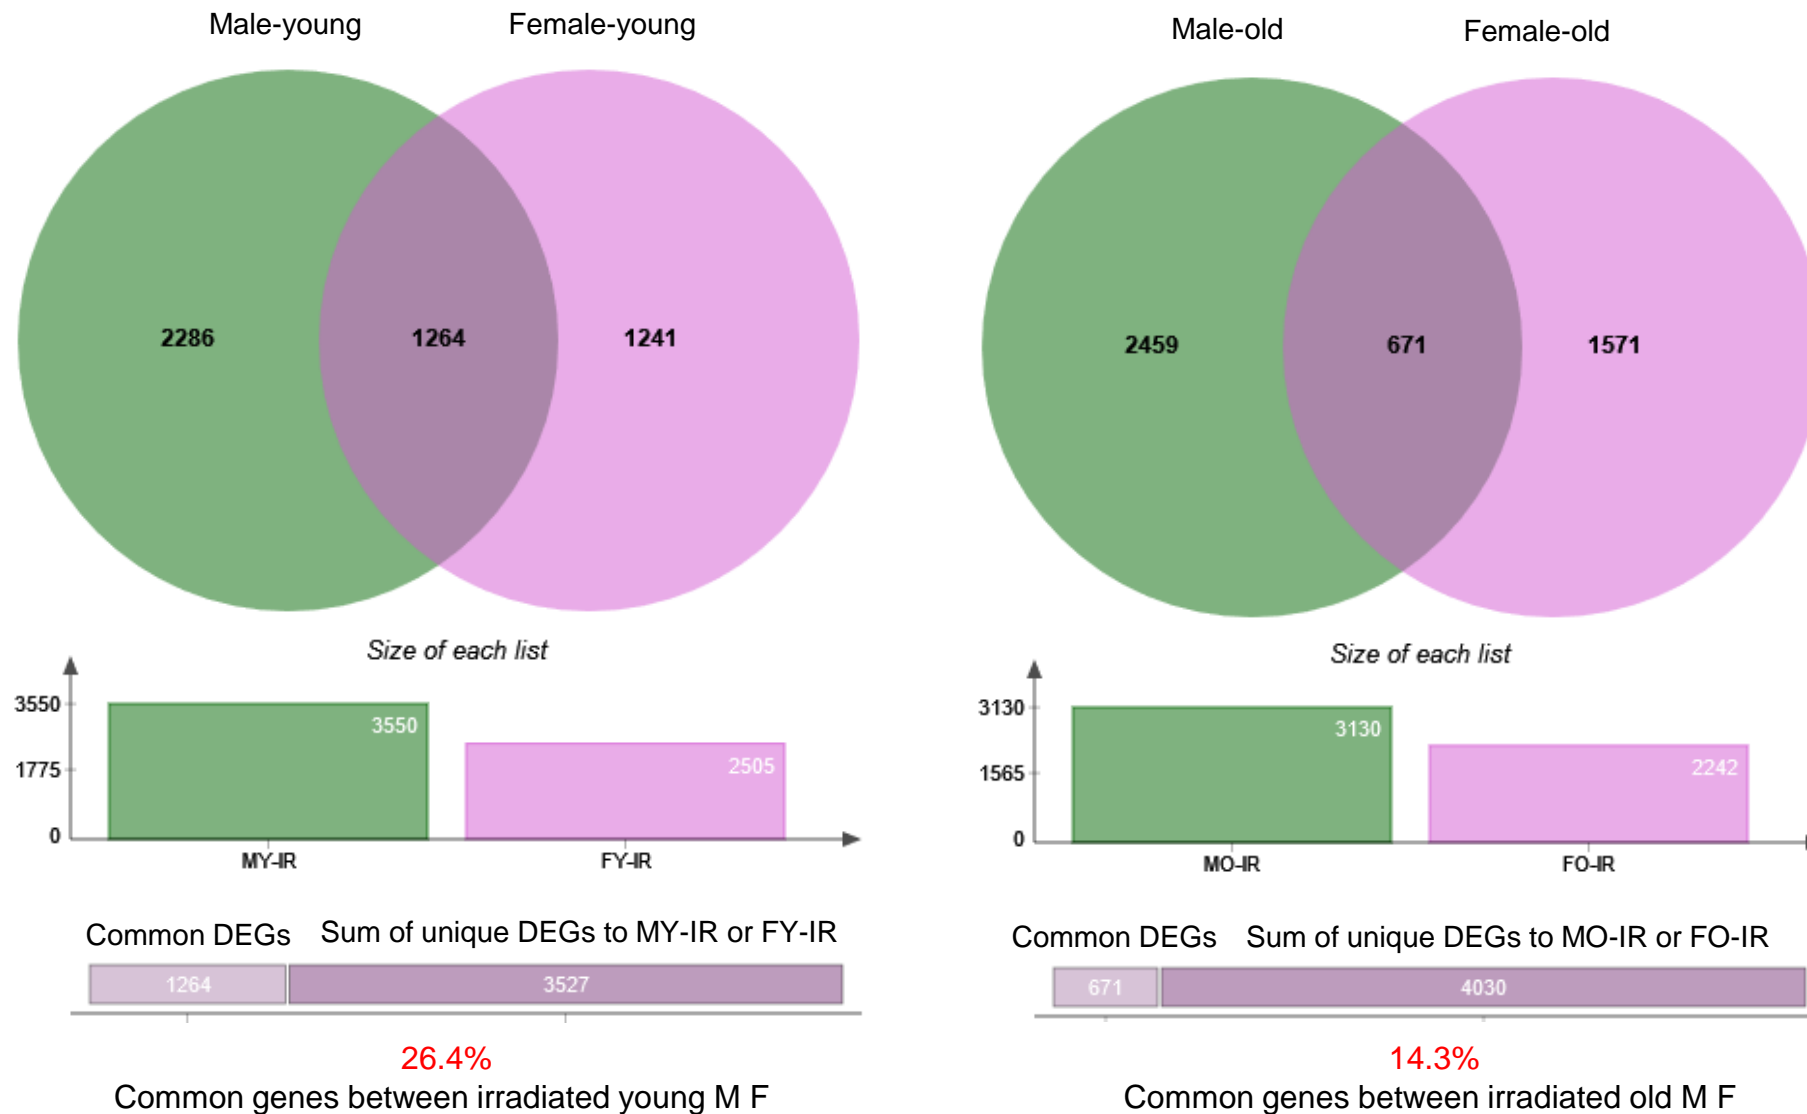

**Supplementary Fig. 1** (related to Fig. 2). Common differentially expressed genes (DEGs) between irradiated young male and irradiated young female mice (*left*) and irradiated old male and irradiated old female mice (*right*). Below the Venn diagrams, the total number of unique and common differentially expressed genes in both sexes is depicted and the percentage of common genes is calculated. M: male; F: female. MY-IR: male young-irradiated; FY: female young-irradiated; MO-IR: male-old-irradiated; FO-IR: female old-irradiated.

**Table S1a.** Immune cell death-related functions between young and old female irradiated mice.

|                                          | Young          | Old    |
|------------------------------------------|----------------|--------|
| <b>Diseases and Functions Annotation</b> | <b>z-score</b> |        |
| Cell death of immune cells               | 3.920          | 0.604  |
| Cell death of blood cells                | 3.774          | 0.187  |
| Cell death of B lymphocytes              | 2.706          | 0.000  |
| Apoptosis of leukocytes                  | 2.705          | -0.449 |
| Cell death of myeloid cells              | 2.537          | 0.000  |
| Cell death of lymphocytes                | 2.370          | 0.000  |
| Cell death of lymphatic system cells     | 2.198          | 0.000  |
| Cell death of lymphoid cells             | 2.182          | 0.000  |
| Cell death of mononuclear leukocytes     | 2.168          | -0.033 |
| Production of antibody                   | -2.346         | -2.020 |
| Quantity of immunoglobulin               | -2.659         | -2.204 |
| Quantity of IgG1                         | -3.046         | 0.000  |
| Quantity of lymphoid tissue              | -2.378         | -0.637 |
| Quantity of B lymphocytes                | -3.155         | 0.000  |
| Quantity of IgG                          | -2.562         | 0.000  |

**Table S1b.** Immune cell death-related functions between young and old female and male irradiated mice.

|                                          | Female         |        | Male   |        |
|------------------------------------------|----------------|--------|--------|--------|
|                                          | 2-mo           | 24-mo  | 2-mo   | 21-mo  |
| <b>Diseases and Functions Annotation</b> | <b>z-score</b> |        |        |        |
| Cell death of immune cells               | 3.920          | 0.604  | 2.285  | -0.276 |
| Cell death of blood cells                | 3.774          | 0.187  | 2.152  | -0.271 |
| Cell death of B lymphocytes              | 2.706          | 0.000  | 2.973  | 1.646  |
| Apoptosis of leukocytes                  | 2.705          | -0.449 | 2.700  | 0.411  |
| Cell death of myeloid cells              | 2.537          | 0.000  | 0.000  | 0.000  |
| Cell death of lymphocytes                | 2.370          | 0.000  | 3.063  | 1.051  |
| Cell death of lymphatic system cells     | 2.198          | 0.000  | 2.774  | 1.131  |
| Apoptosis of lymphoid cells              | 2.056          | 0.000  | 2.620  | 0.000  |
| Apoptosis of mononuclear leukocytes      | 2.008          | -0.033 | 2.632  | 0.697  |
| Quantity of lymphoid tissue              | -2.378         | -0.637 | -3.742 | -2.028 |
| Quantity of B lymphocytes                | -3.155         | 0.000  | -4.166 | -3.120 |
| Quantity of T lymphocytes                | 0.000          | 0.000  | -2.538 | -1.260 |
| Quantity of lymphocytes                  | 0.000          | 0.000  | -3.206 | -1.960 |

**Table S2a.** Phagocytosis-related functions between young and old female mice exposed to 4 Gy x-rays.

| Diseases and Functions Annotations       | Young   | Old   |
|------------------------------------------|---------|-------|
|                                          | z-score |       |
| Endocytosis                              | 5.861   | 3.029 |
| Cell movement of phagocytes              | 5.113   | 3.382 |
| Engulfment of cells                      | 5.100   | 3.082 |
| Endocytosis by eukaryotic cells          | 5.068   | 2.496 |
| Phagocytosis                             | 5.061   | 2.470 |
| Migration of phagocytes                  | 4.519   | 2.150 |
| Phagocytosis of cells                    | 4.467   | 2.643 |
| Chemotaxis of phagocytes                 | 4.317   |       |
| Recruitment of phagocytes                | 4.266   | 3.052 |
| Activation of phagocytes                 | 3.958   |       |
| Phagocytosis of myeloid cells            | 3.678   |       |
| Engulfment of blood cells                | 3.595   |       |
| Engulfment of leukocytes                 | 3.507   |       |
| Phagocytosis of blood cells              | 3.506   |       |
| Phagocytosis of leukocytes               | 3.415   |       |
| Phagocytosis of phagocytes               | 3.269   |       |
| Engulfment of phagocytes                 | 2.971   |       |
| Degranulation of phagocytes              | 2.69    |       |
| Cell death of phagocytes                 | 2.603   |       |
| Cellular infiltration by phagocytes      | 2.497   |       |
| Immune response of phagocytes            | 2.325   |       |
| Cell viability of phagocytes             | 2.259   |       |
| Apoptosis of phagocytes                  | 2.073   |       |
| Binding of professional phagocytic cells |         | 2.305 |

**Table S2b.** Comparison of phagocytosis-related functions between male and female mice exposed to 4 Gy x-rays.

| Diseases or Functions Annotation         | Young   | Old   |
|------------------------------------------|---------|-------|
|                                          | z-score |       |
| Phagocytosis                             | 4.372   |       |
| Phagocytosis of cells                    | 4.123   | 2.042 |
| Engulfment of cells                      | 3.943   |       |
| Internalization of cells                 | 3.778   |       |
| Cell movement of phagocytes              | 3.712   |       |
| Endocytosis                              | 3.519   |       |
| Endocytosis by eukaryotic cells          | 3.416   | 2.162 |
| Cell death of phagocytes                 | 3.163   |       |
| Phagocytosis of blood cells              | 3.145   |       |
| Phagocytosis of phagocytes               | 3.127   |       |
| Apoptosis of phagocytes                  | 3.054   |       |
| Phagocytosis of myeloid cells            | 3.020   |       |
| Phagocytosis of leukocytes               | 3.008   |       |
| Engulfment of myeloid cells              | 2.925   |       |
| Migration of phagocytes                  | 2.852   |       |
| Engulfment of blood cells                | 2.790   |       |
| Phagocytosis of antigen presenting cells | 2.700   |       |
| Engulfment of leukocytes                 | 2.648   |       |
| Engulfment of phagocytes                 | 2.548   |       |
| Engulfment by macrophages                | 2.236   |       |
| Recruitment of phagocytes                | 2.112   |       |

**Table S3a.** Neutrophil-associated functions among irradiated mice of different sex and age.

|                                         | female         |       | male  |       |
|-----------------------------------------|----------------|-------|-------|-------|
|                                         | 2-mo           | 24-mo | 2-mo  | 21-mo |
| <b>Diseases or Functions Annotation</b> | <b>z-score</b> |       |       |       |
| Recruitment of neutrophils              | 3.829          |       | 2.944 |       |
| Cell movement of neutrophils            | 3.096          | 3.280 |       |       |
| Chemotaxis of neutrophils               | 4.523          |       |       |       |
| Migration of neutrophils                | 2.700          |       |       |       |
| Infiltration by neutrophils             | 2.200          |       |       |       |
| Degranulation of neutrophils            | 2.121          |       |       |       |

**Table S3c.** Myeloid-associated functions among irradiated mice of different sex and age.

|                                         | female         |       | male  |       |
|-----------------------------------------|----------------|-------|-------|-------|
|                                         | 2-mo           | 24-mo | 2-mo  | 21-mo |
| <b>Diseases or Functions Annotation</b> | <b>z-score</b> |       |       |       |
| Cell movement of myeloid cells          | 5.22           | 3.508 | 2.454 |       |
| Recruitment of myeloid cells            | 4.338          |       |       |       |
| Activation of myeloid cells             | 4.184          |       | 3.665 |       |
| Chemotaxis of myeloid cells             | 4.523          | 3.315 |       |       |
| Binding of myeloid cells                | 3.835          | 2.975 | 3.218 |       |
| Phagocytosis of myeloid cells           | 3.678          |       |       |       |
| Adhesion of myeloid cells               | 3.386          |       |       |       |
| Migration of myeloid cells              | 3.311          |       |       |       |
| Response of myeloid cells               | 3.155          |       | 3.089 |       |
| Cellular infiltration by myeloid cells  | 2.885          |       |       |       |
| Engulfment of myeloid cells             |                |       | 3.745 |       |
| Recruitment of myeloid cells            |                |       | 2.713 |       |

**Table S3b.** Reactive oxygen species synthesis and metabolism-associated functions among irradiated mice of different sex and age.

|                                         | female         |       | male  |       |
|-----------------------------------------|----------------|-------|-------|-------|
|                                         | 2-mo           | 24-mo | 2-mo  | 21-mo |
| <b>Diseases or Functions Annotation</b> | <b>z-score</b> |       |       |       |
| Metabolism of reactive oxygen species   | 5.821          | 2.278 | 3.489 |       |
| Synthesis of reactive oxygen species    | 5.645          | 2.267 | 3.291 |       |
| Production of reactive oxygen species   | 4.47           | 2.031 | 3.224 |       |
| Production of superoxide                | 2.684          |       |       |       |
